# Supplementary material for: The disease severity of COVID-19 caused by Omicron variants: A brief review
Source: PubMed Central journal article supplement — Ann Clin Epidemiol. 2023 Apr 1;5(2):31–6. doi: 10.37737/ace.23005 (PMC10944996; doi:10.37737/ace.23005), 2023-04-01
Supplement: ace23005s1.pdf [file ace23005s1.pdf]

**Supplementary Table 1 Search queries**

| <b>No.</b> | <b>Search query</b>                                                                                                                          |
|------------|----------------------------------------------------------------------------------------------------------------------------------------------|
| 1          | (omicron[Title/Abstract]) AND ( (2021:2023[pdat]) AND ((mortality[Title/Abstract]) OR (severe[Title/Abstract])))                             |
| 2          | (omicron[Title/Abstract]) AND ( (2021:2023[pdat]) AND (delta[Title/Abstract]) AND ((mortality[Title/Abstract]) OR (severe[Title/Abstract]))) |
| 3          | (omicron[Title/Abstract]) AND ( (2021:2023[pdat]) AND ((mortality[Title/Abstract]) OR (severe[Title/Abstract]))) AND (japan[Title/Abstract]) |
